# Supplementary material for: Receptor-interacting protein kinase 2 (RIPK2) stabilizes c-Myc and is a therapeutic target in prostate cancer metastasis
Source: PubMed Central journal article supplement (PMC8813925; doi:10.1038/s41467-022-28340-6), 2022-02-03
Supplement: 41467_2022_28340_MOESM3_ESM.pdf [file 41467_2022_28340_MOESM3_ESM.pdf]

## Description of Additional Supplementary Files

**Supplementary Data 1.** Labelfree proteomic identification and quantification of proteins in control and RIPK2-KO PC3 cells.

**Supplementary Data 2.** List of the 652 protein groups that are differentially expressed in control and RIPK2-KO PC3 cells.

**Supplementary Data 3.** List of the 219 protein candidates that associate with the kinase domain and no other regions of RIPK2.

**Supplementary Data 4.** Labelfree phosphoproteomic comparison of control and RIPK2-KO PC3 cells.

**Supplementary Data 5.** List of kinases whose inferred kinase activities are regulated by RIPK2 in PC3 cells.
